# Supplementary material
Source: publisher figshare collection journal article supplement (https://frontiersin.figshare.com/ndownloader/files/34857789)
Supplement: Supplementary file [file 34857789]

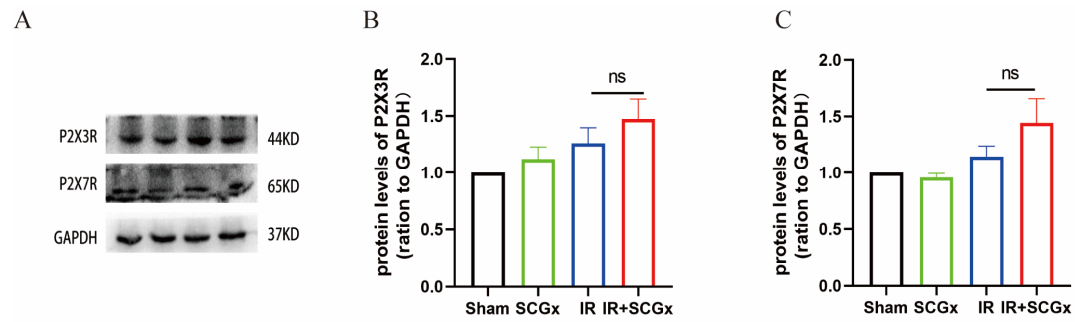

**Figure S1. The protein levels of the purinergic P2X receptor in the kidney.** (A) Representative images of protein levels of P2X3R and P2X7R. (B, C) The expression levels of P2X3R and P2X7R in the kidney were normalized to GAPDH within the same sample. GAPDH served as an internal control. “ns”,  $P > 0.05$ , each group contains at least 4 rats.
